# Supplementary material for: Biofilm properties in relation to treatment outcome in patients with first-time periprosthetic hip or knee joint infection
Source: PubMed Central journal article supplement — J Orthop Translat. 2021 Aug 19;30:31–40. doi: 10.1016/j.jot.2021.05.008 (PMC8385121; doi:10.1016/j.jot.2021.05.008), 2021-08-19
Supplement: mmc1.pdf [file mmc1.pdf]

## **Biofilm properties in relation to treatment outcome in patients with first-time periprosthetic hip or knee joint infection**

Svensson Malchau Karin<sup>1,2,\*</sup>, Tillander Jonatan<sup>3,2</sup>, Zaborowska Magdalena<sup>4,2</sup>, Hoffman Maria<sup>4,2</sup>, Lasa Iñigo<sup>5</sup>, Thomsen Peter<sup>4</sup>, Malchau Henrik<sup>6</sup>, Rolfson Ola<sup>1</sup>, Trobos Margarita<sup>4,2,\*</sup>

<sup>1</sup>Department of Orthopaedics, Institute of Clinical Sciences, The Sahlgrenska Academy, University of Gothenburg, Sweden

<sup>2</sup>Center for Antibiotic Resistance Research (CARE) at University of Gothenburg, Gothenburg, Sweden

<sup>3</sup>Department of Infectious Diseases, Institute of Biomedicine, The Sahlgrenska Academy, University of Gothenburg, Sweden

<sup>4</sup>Department of Biomaterials, Institute of Clinical Sciences, The Sahlgrenska Academy, University of Gothenburg, Sweden

<sup>5</sup> Microbial Pathogenesis Research Unit, Public University of Navarre, Spain

<sup>6</sup>Harvard Medical School, Harvard University, Boston, Massachusetts, USA

### **\*Corresponding authors:**

Margarita Trobos, [margarita.trobos@biomaterials.gu.se](mailto:margarita.trobos@biomaterials.gu.se)

Karin Svensson Malchau, [karin.am.svensson@vgregion.se](mailto:karin.am.svensson@vgregion.se)

**Supplementary Table S1. Biofilm production categories as measured by CFU/peg and the mean crystal violet OD.** Biofilm production was further divided in subcategories in order to investigate if there were differences between different biofilm degrees. The breakpoints for this new classification were: non-producer ( $OD_{570} < 0.120$ ), weak ( $0.120 < OD_{570} < 0.240$ ), moderate ( $0.240 < OD_{570} < 0.480$ ) and strong ( $OD_{570} > 0.480$ ).

| <b>Biofilm category</b> | <b>CFU/peg</b>    | <b>Crystal violet OD</b> |
|-------------------------|-------------------|--------------------------|
| <b>Non</b>              | $1.9 \times 10^5$ | 0.318                    |
| <b>Weak</b>             | $4.7 \times 10^4$ | 0.603                    |
| <b>Moderate</b>         | $9.3 \times 10^4$ | 0.813                    |
| <b>Strong</b>           | $1.6 \times 10^5$ | 0.973                    |

**Supplementary Table S2. Inflammatory markers and duration of symptoms in regards to biofilm production.** Factors are presented as mean with standard deviation (SD), median with interquartile range (IQR) and the minimum and maximum value. Unit used is mg/L.

Abbreviations: erythrocyte sedimentation rate (ESR), white blood cell count (WBC), C-reactive protein (CRP).

| <b>Inflammatory markers</b>           | <b>Non-weak biofilm producers</b> | <b>Strong biofilm producers</b> |
|---------------------------------------|-----------------------------------|---------------------------------|
| <b>ESR</b>                            |                                   |                                 |
| Mean ( <i>SD</i> )                    | 55 (26)                           | 47 (31)                         |
| Median ( <i>IQR</i> )                 | 41 (40-75)                        | 39 (20-83)                      |
| Minimum-maximum                       | 20-106                            | 7-120                           |
| <b>WBC</b>                            |                                   |                                 |
| Mean ( <i>SD</i> )                    | 7.5 (1.7)                         | 8.4 (3.4)                       |
| Median ( <i>IQR</i> )                 | 7.5 (6.0-8.7)                     | 7.8 (6.0-9.8)                   |
| Minimum-maximum                       | 5.7-11.2                          | 3.6-23.7                        |
| <b>CRP</b>                            |                                   |                                 |
| Mean ( <i>SD</i> )                    | 51 (49)                           | 105 (116)                       |
| Median ( <i>IQR</i> )                 | 43 (17-46)                        | 47 (18-160)                     |
| Minimum-maximum                       | 3-170                             | 2-450                           |
| <b>Time</b>                           |                                   |                                 |
| <b>Index surgery to symptom onset</b> |                                   |                                 |
| Mean (SD)                             | 529 (1041)                        | 426 (835)                       |
| Median (IQR)                          | 195 (18-405)                      | 107 (20-405)                    |
| Minimum-maximum                       | 0-4200                            | 6-4343                          |
| <b>Symptom onset to reoperation</b>   |                                   |                                 |
| Mean (SD)                             | 31 (29)                           | 50 (110)                        |
| Median (IQR)                          | 16 (9-68)                         | 8 (3-58)                        |
| Minimum-maximum                       | 1-82                              | 1-452                           |

**Supplementary Table S3. Recurrent infections.** Characteristics of strains causing confirmed relapses and reinfections in patients with saved strains from subsequent operations.

| Patient | Reoperation Number due to PJI (days from prior reoperation) | Procedure   | Recurrent PJI (relapse or reinfection) | Strain            | Species               | MLST    | OD    | Biofilm | Phenotypic resistance according to MIC | AB received (iv/po) | AB duration (weeks) | Infection resolution |
|---------|-------------------------------------------------------------|-------------|----------------------------------------|-------------------|-----------------------|---------|-------|---------|----------------------------------------|---------------------|---------------------|----------------------|
| H15     | 1                                                           | stage 1     | First-time                             | 6931              | <i>S. epidermidis</i> | ST-59   | 0.224 | W       | OXA, TRI, SUL                          | VAN/RIF+CLI         | 13                  |                      |
|         | 2 (150 days)                                                | stage 2     | Reinfection                            | 6932              | <i>S. hominis</i>     | -       | 0.532 | S       | CLI, OXA, TRI, SUL                     | VAN/0               | 1                   | Yes                  |
| H28     | 1                                                           | Stem ex     | First-time                             | 6942              | <i>S. aureus</i>      | ST-25   | 1.621 | S       | 0                                      | VAN/0               | 2                   | No                   |
|         | 2 (12 days)                                                 | DAIR, NE    | Reinfection                            | 6943              | <i>S. aureus</i>      | ST-25   | 0.552 | S       | CLI, OXA, FA                           | VAN/RIF+CLI         | 13                  | Yes                  |
| H50     | Arthroscopy <sup>a</sup>                                    | -           | First-time <sup>a</sup>                | 6953              | <i>S. aureus</i>      | ST-3457 | 0.518 | S       | 0                                      | -                   | -                   | -                    |
|         | 1 (239 days)                                                | DAIR, E     | Reinfection                            | 6954              | <i>S. epidermidis</i> | ST-215  | 0.060 | N       | CIP, CLI, OXA, FA                      | VAN/TEI             | 16                  | Yes                  |
| H53     | 1                                                           | stage 1     | First-time                             | 6957              | <i>S. lugdunensis</i> | ST-3    | 2.705 | S       | CLI                                    | CDX/RIF+CIP         | 7                   |                      |
|         | 2 (163 days)                                                | stage 2     | Reinfection                            | 6956              | <i>S. epidermidis</i> | ST-215  | 0.247 | M       | CIP, CLI, OXA, FA, RIF                 | FLX/FLX             | 2                   | No                   |
| H56     | 1                                                           | DAIR, E     | First-time                             | 6960              | <i>S. epidermidis</i> | ST-2    | 0.584 | S       | CIP, OXA, TRI, SUL                     | VAN/RIF+CLI         | 20                  | No                   |
|         | 2 (174 days)                                                | Cuprevision | Reinfection                            | 6961              | <i>S. capitis</i>     | -       | 0.148 | W       | CLI                                    | VAN/0               | 2                   | No                   |
|         | 3 (11 days)                                                 | DAIR, E     | Relapse (from 6960)                    | 6962 <sup>b</sup> | <i>S. epidermidis</i> | ST-2    | 0.583 | S       | CIP, CLI, OXA, RIF, TRI, SUL           | VAN/CIP             | 29                  | No                   |
| H6      | 1                                                           | DAIR, E     | First-time                             | 6922              | <i>S. aureus</i>      | ST-45   | 1.767 | S       | 0                                      | VAN/TEI             | 4.5                 | No                   |
|         | 2 (34 days)                                                 | DAIR, E     | Reinfection                            | 6923              | <i>S. epidermidis</i> | ST-2    | 0.512 | S       | CIP, CLI, OXA, FA, RIF, TRI, SUL       | VAN/TEI             | life                | No                   |
|         |                                                             |             | Relapse (from 6922)                    | 6924              | <i>S. aureus</i>      | ST-45   | 1.333 | S       | 0                                      | VAN/TEI             | life                | No                   |
| H86     | 1                                                           | stage 1     | First-time                             | 6994              | <i>S. epidermidis</i> | ST-48   | 1.431 | S       | OXA, FA                                | VAN/RIF+CIP         | 19                  | No                   |
|         |                                                             |             |                                        | 6995              | <i>S. epidermidis</i> | ST-48   | 3.333 | S       | OXA, FA                                | VAN/RIF+CIP         | 19                  | No                   |
|         |                                                             |             |                                        | 6996              | <i>S. epidermidis</i> | ST-48   | 3.333 | S       | OXA, FA                                | VAN/RIF+CIP         | 19                  | No                   |
|         | 2 (139 days)                                                | stage 2     | -                                      | -                 | -                     | -       | -     | -       | -                                      | -                   | -                   |                      |
|         | 3 (13 days)                                                 | DAIR, E     | Reinfection                            | 6997              | <i>S. epidermidis</i> | ST-434  | 0.59  | N       | CIP, CLI, OXA, FA, TRI, SUL            | VAN/LZD             | 4                   | Yes                  |
|         |                                                             |             | Reinfection                            | 6998              | <i>S. epidermidis</i> | ST-2    | 0.215 | W       | CIP, CLI, OXA, RIF, TRI, SUL           | VAN/LZD             | 4                   | Yes                  |
| K13     | 1                                                           | DAIR, E     |                                        | 7005              | <i>S. epidermidis</i> | ST-2    | 0.318 | M       | CIP, CLI, OXA, FA, TRI, SUL            | VAN/TEI             | 34                  | No                   |
|         | 2 (529 days)                                                | stage 1     | Relapse                                | 7006              | <i>S. epidermidis</i> | ST-2    | 3.322 | S       | CIP, CLI, OXA, FA                      | VAN/LZD             | 6                   | Yes, after stage 2   |
| K2      | 1                                                           | stage 1     | First-time                             | 6999              | <i>S. epidermidis</i> | ST-215  | 0.073 | N       | CIP, CLI, OXA, FA, TRI, SUL            | VAN/0               | 13                  | No                   |
|         |                                                             |             |                                        | 7000              | <i>S. epidermidis</i> | ST-215  | 0.099 | N       | CIP, CLI, OXA, FA                      | VAN/0               | 13                  | No                   |
|         | 2 (126 days)                                                | stage 2     | -                                      | -                 | -                     | -       | -     | -       | -                                      | -                   | -                   |                      |
|         | 3 (348 days)                                                | stage 1     | Relapse from 6999                      | 7001              | <i>S. epidermidis</i> | ST-215  | 0.055 | N       | CIP, CLI, OXA, FA, TRI, SUL            | VAN/0               | 8                   | Yes, after stage 2   |
| K23     | 1                                                           | DAIR, E     |                                        | 7012              | <i>S. aureus</i>      | ST-630  | 0.441 | M       | 0                                      | FLX/RIF+CIP         | 16                  | No                   |
|         | 2 (157 days)                                                | stage 1     | Relapse                                | 7013              | <i>S. aureus</i>      | ST-630  | 0.277 | M       | 0                                      | FLX/RIF+CIP         | 32                  | No                   |
| K29     | 1                                                           | DAIR, E     |                                        | 7018              | <i>S. aureus</i>      | ST-20   | 1.140 | S       | 0                                      | VAN/LZD             | 7                   | No                   |
|         |                                                             |             |                                        | 7019              | <i>S. epidermidis</i> | ST-215  | 0.058 | N       | CIP, CLI, OXA, FA, TRI, SUL            | VAN/LZD             | 7                   | No                   |
|         |                                                             |             |                                        | 7020              | <i>S. epidermidis</i> | ST.2    | 0.608 | S       | CIP, OXA, TRI, SUL                     | VAN/LZD             | 7                   | No                   |
|         |                                                             |             |                                        | 7021              | <i>S. simulans</i>    | -       | 0.275 | M       | CIP, OXA                               | VAN/LZD             | 7                   | No                   |
|         | 2 (51 days)                                                 | DAIR, E     | Relapse from 7018                      | 7022              | <i>S. aureus</i>      | ST-20   | 0.764 | S       | 0                                      | VAN/RIF+CIP         | 2                   | No                   |
|         | 3 (15 days)                                                 | stage 1     | Relapse from 7020                      | 7023              | <i>S. epidermidis</i> | ST-2    | 0.667 | S       | CIP, OXA, TRI, SUL                     | VAN/RIF+CIP         | 15                  | Yes, after stage 2   |
|         |                                                             |             | Relapse from 7020                      | 7024              | <i>S. epidermidis</i> | ST-2    | 0.902 | S       | CIP, OXA, TRI, SUL                     | VAN/RIF+CIP         | 15                  | Yes, after stage 2   |
| K8      | 1                                                           | DAIR, NE    |                                        | 7002              | <i>S. aureus</i>      | ST-789  | 1.821 | S       | 0                                      | VAN/0               | 0                   | No                   |
|         | 2 (2 days)                                                  | DAIR, E     | Reinfection                            | 7003              | <i>S. capitis</i>     | -       | 0.411 | M       | OXA                                    | VAN/RIF+CLI         | 28                  | Yes                  |

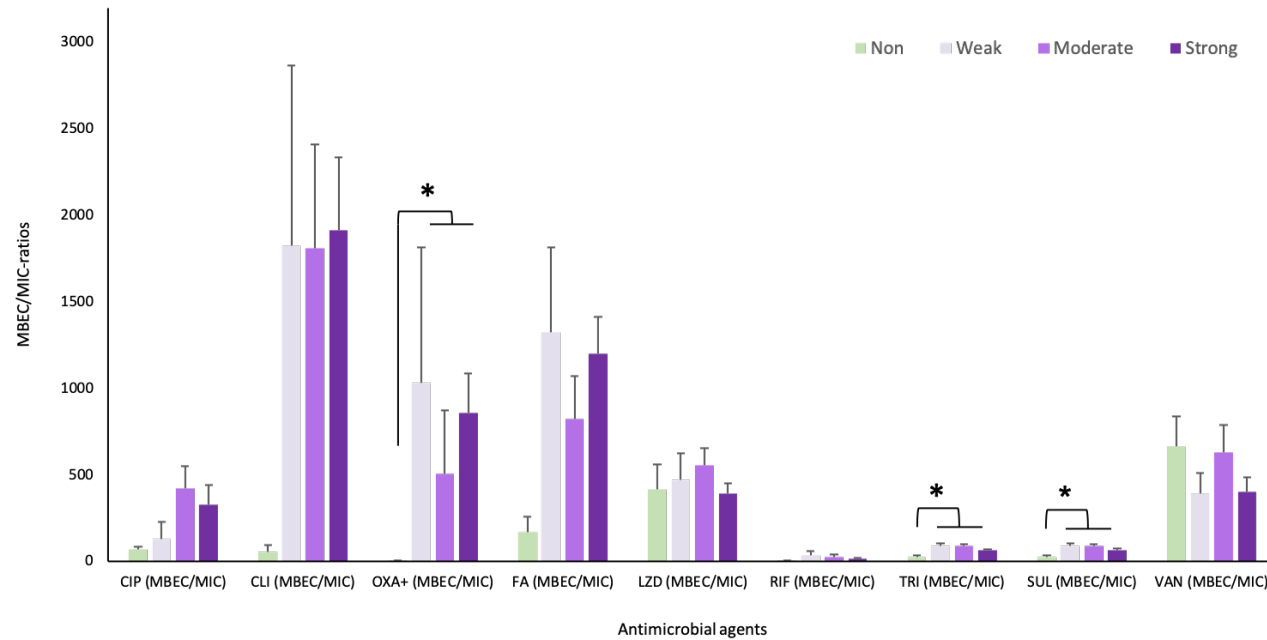

**Supplementary Figure S4. Mean MBEC/MIC-ratios per antimicrobial agent and different degrees of biofilm production.** was further divided in subcategories in order to investigate if there were differences between different biofilm degrees. The breakpoints for this new classification were: non-producer ( $OD_{570} < 0.120$ ), weak ( $0.120 < OD_{570} < 0.240$ ), moderate ( $0.240 < OD_{570} < 0.480$ ) and strong ( $OD_{570} > 0.480$ ). \*indicates statistical significant difference between the groups with  $p < 0.001$ .
